# Supplementary material
Source: PubMed Central journal article supplement (PMC4945555)
Supplement: 11606_2016_3651_MOESM1_ESM.pdf [file 11606_2016_3651_MOESM1_ESM.pdf]

Supplemental Table S1 for Incremental Cost-Effectiveness of Adding 13-valent Pneumococcal Conjugate Vaccine to Vaccine Recommendations for Adults Age 50 Years and Older

PPSV for high risk and PPSV+PCV at 65 for all

|                            |                 |
|----------------------------|-----------------|
| IPD Cases                  | 28271.348       |
| Hospitalized NBP Cases     | 766346.662      |
| Non-hospitalized NBP Cases | 1248296.097     |
| Deaths due to IPD          | 3710.699        |
| Deaths due to NBP          | 46140.962       |
| QALYs                      | -369466.784     |
| Life-years                 | -564754.018     |
| Total Cost                 | 22668393653.574 |
| Medical Costs              | 22152294946.535 |
| Vaccine Costs              | 516098707.039   |

PPSV for high risk and PPSV at 65

|                            |                 |
|----------------------------|-----------------|
| IPD Cases                  | 28497.154       |
| Hospitalized NBP Cases     | 771307.996      |
| Non-hospitalized NBP Cases | 1255547.610     |
| Deaths due to IPD          | 3743.742        |
| Deaths due to NBP          | 46473.371       |
| QALYs                      | -372519.745     |
| Life-years                 | -569381.279     |
| Total Cost                 | 22478910951.137 |
| Medical Costs              | 22284276567.416 |
| Vaccine Costs              | 194634383.721   |

PPSV for high risk and PCV at 65 for all

|                            |                 |
|----------------------------|-----------------|
| IPD Cases                  | 29795.430       |
| Hospitalized NBP Cases     | 766346.662      |
| Non-hospitalized NBP Cases | 1248296.097     |
| Deaths due to IPD          | 3928.140        |
| Deaths due to NBP          | 46140.962       |
| QALYs                      | -371136.802     |
| Life-years                 | -567498.376     |
| Total Cost                 | 22543073396.732 |
| Medical Costs              | 22196414903.359 |
| Vaccine Costs              | 346658493.373   |

PPSV for high risk and PPSV at 65 and PCV at 60

|                            |             |
|----------------------------|-------------|
| IPD Cases                  | 28442.426   |
| Hospitalized NBP Cases     | 769147.161  |
| Non-hospitalized NBP Cases | 1252093.863 |

|                   |                 |
|-------------------|-----------------|
| Deaths due to IPD | 3740.602        |
| Deaths due to NBP | 46340.589       |
| QALYs             | -371519.831     |
| Life-years        | -567874.636     |
| Total Cost        | 22764946774.043 |
| Medical Costs     | 22222767025.587 |
| Vaccine Costs     | 542179748.456   |

PPSV for high risk and PPSV at 65 and PCV at 50

|                            |                 |
|----------------------------|-----------------|
| IPD Cases                  | 28320.856       |
| Hospitalized NBP Cases     | 768712.063      |
| Non-hospitalized NBP Cases | 1251117.055     |
| Deaths due to IPD          | 3729.012        |
| Deaths due to NBP          | 46325.275       |
| QALYs                      | -371150.430     |
| Life-years                 | -567411.884     |
| Total Cost                 | 22977183385.179 |
| Medical Costs              | 22201911374.355 |
| Vaccine Costs              | 775272010.824   |

PPSV for high risk and PPSV+PCV at 65 for all, higher QALY values

|                            |              |
|----------------------------|--------------|
| IPD Cases                  | 28271.34769  |
| Hospitalized NBP Cases     | 766346.6616  |
| Non-hospitalized NBP Cases | 1248296.097  |
| Deaths due to IPD          | 3710.698841  |
| Deaths due to NBP          | 46140.96185  |
| QALYs                      | -441175.8894 |
| Life-years                 | -564754.0182 |
| Total Cost                 | 22668393654  |
| Medical Costs              | 22152294947  |
| Vaccine Costs              | 516098707    |

PPSV for high risk and PPSV+PCV at 65 for all, rapid waning

|                            |              |
|----------------------------|--------------|
| IPD Cases                  | 28324.58188  |
| Hospitalized NBP Cases     | 766621.2476  |
| Non-hospitalized NBP Cases | 1248697.433  |
| Deaths due to IPD          | 3718.711249  |
| Deaths due to NBP          | 46159.35911  |
| QALYs                      | -369505.7016 |
| Life-years                 | -564854.8637 |
| Total Cost                 | 22676877474  |
| Medical Costs              | 22160778767  |
| Vaccine Costs              | 516098707    |

PPSV for high risk and PPSV+PCV at 65 for all, private price for vaccine cost

|                            |              |
|----------------------------|--------------|
| IPD Cases                  | 28271.34769  |
| Hospitalized NBP Cases     | 766346.6616  |
| Non-hospitalized NBP Cases | 1248296.097  |
| Deaths due to IPD          | 3710.698841  |
| Deaths due to NBP          | 46140.96185  |
| QALYs                      | -369466.7843 |
| Life-years                 | -564754.0182 |
| Total Cost                 | 22887300154  |
| Medical Costs              | 22152294947  |
| Vaccine Costs              | 735005207.5  |

PPSV for high risk and PPSV+PCV at 65 for all, Medicare price for vaccine cost

|                            |              |
|----------------------------|--------------|
| IPD Cases                  | 28271.34769  |
| Hospitalized NBP Cases     | 766346.6616  |
| Non-hospitalized NBP Cases | 1248296.097  |
| Deaths due to IPD          | 3710.698841  |
| Deaths due to NBP          | 46140.96185  |
| QALYs                      | -369466.7843 |
| Life-years                 | -564754.0182 |
| Total Cost                 | 22954006282  |
| Medical Costs              | 22152294947  |
| Vaccine Costs              | 801711335    |

PPSV for high risk and PPSV+PCV at 65 for all, no phasing of herd protection

|                            |              |
|----------------------------|--------------|
| IPD Cases                  | 28425.57202  |
| Hospitalized NBP Cases     | 769450.1099  |
| Non-hospitalized NBP Cases | 1252832.114  |
| Deaths due to IPD          | 3736.461988  |
| Deaths due to NBP          | 46348.89288  |
| QALYs                      | -371634.6928 |
| Life-years                 | -568000.0897 |
| Total Cost                 | 22750291935  |
| Medical Costs              | 22234193228  |
| Vaccine Costs              | 516098707    |

PPSV for high risk and PPSV+PCV at 65 for all, PPSV23 effective against NBP

|                        |             |
|------------------------|-------------|
| IPD Cases              | 28271.34769 |
| Hospitalized NBP Cases | 745059.6893 |

|                            |              |
|----------------------------|--------------|
| Non-hospitalized NBP Cases | 1216710.99   |
| Deaths due to IPD          | 3710.698841  |
| Deaths due to NBP          | 44733.8935   |
| QALYs                      | -357122.8276 |
| Life-years                 | -546202.0729 |
| Total Cost                 | 22123393228  |
| Medical Costs              | 21607294520  |
| Vaccine Costs              | 516098707    |
